# Supplementary material
Source: Springer Nature journal article supplement (https://www.springermedizin.de/resource/supplementary/12913_2009_1093_MOESM1_ESM.pdf/9536332)

## Reasons patients chose to seek care in the urgent care setting

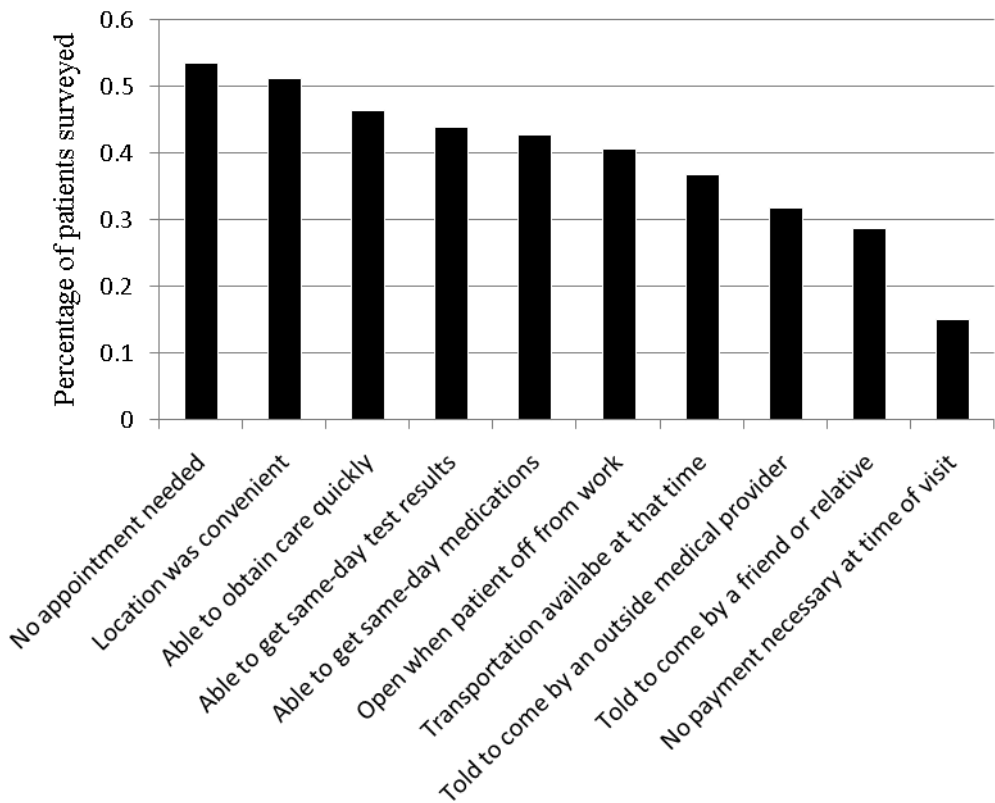

Supplement: MOESM1 [file 9536332]
